# Supplementary material for: Validity and inter-rater reliability of ankle motion observed during a single leg squat
Source: PeerJ. 2022 Feb 15;10:e12990. doi: 10.7717/peerj.12990 (PMC8855718; doi:10.7717/peerj.12990)
Supplement: Data S1 [file peerj-10-12990-s001.xlsx]

## Sheet: Data
ID	Side	Gender	Age (yrs.)	Height (cm)	Weigth (kg)	Navicular_Drop (mm)	Rater_1_Day_1_SLSankle	Rater_1_Day_2_SLSankle	Rater_2_SLSankle
1	left	female	21	161	67.7	6	poor	poor	poor
1	right	female	21	161	67.7	3	reduced	reduced	reduced
2	left	male	22	180	87.5	5	reduced	reduced	reduced
2	right	male	22	180	87.5	3	poor	poor	poor
3	left	female	20	158	51.9	5	good	good	good
3	right	female	20	158	51.9	3	poor	poor	poor
4	left	male	27	187.5	80.5	4	good	good	good
4	right	male	27	187.5	80.5	4	poor	poor	poor
5	left	male	21	189.5	89.4	6	good	good	good
5	right	male	21	189.5	89.4	6	good	good	good
6	left	female	21	160.5	55.7	1	good	good	good
6	right	female	21	160.5	55.7	6	poor	poor	poor
7	left	male	52	167.5	80.3	4	good	good	good
7	right	male	52	167.5	80.3	12	poor	poor	poor
8	left	female	21	167	62.1	2	good	good	good
8	right	female	21	167	62.1	4	good	good	good
9	left	male	55	173.5	82.7	5	reduced	reduced	reduced
9	right	male	55	173.5	82.7	6	poor	poor	poor
10	left	female	19	153.5	55.3	4	good	good	good
10	right	female	19	153.5	55.3	6.1	poor	poor	poor
11	left	female	21	164.5	54.6	4	poor	poor	poor
11	right	female	21	164.5	54.6	7	reduced	reduced	reduced
12	left	male	54	180.6	71.8	6	reduced	reduced	reduced
12	right	male	54	180.6	71.8	4	poor	poor	poor
13	left	female	51	154	70.9	2	good	good	good
13	right	female	51	154	70.9	5	reduced	reduced	reduced
14	left	female	21	166	60.2	5	poor	poor	poor
14	right	female	21	166	60.2	7	reduced	reduced	reduced
15	left	female	15	171	62.3	8	poor	poor	poor
15	right	female	15	171	62.3	6	reduced	poor	poor
16	left	female	21	148.6	56.4	2	good	good	good
16	right	female	21	148.6	56.4	2	reduced	reduced	reduced
17	left	male	58	172	84.3	4	reduced	reduced	reduced
17	right	male	58	172	84.3	6	poor	poor	poor
18	left	female	19	168	73.5	6	good	good	good
18	right	female	19	168	73.5	4	reduced	reduced	poor
19	left	female	21	151	44.7	5	reduced	reduced	reduced
19	right	female	21	151	44.7	5	poor	poor	poor
20	left	female	22	169	56.4	5	good	good	good
20	right	female	22	169	56.4	6	poor	poor	poor
21	left	male	16	167	65	4	good	good	good
21	right	male	16	167	65	5	poor	poor	poor
22	left	female	19	170	63.4	3	reduced	good	reduced
22	right	female	19	170	63.4	7	poor	poor	poor
23	left	female	22	165	64.9	2	reduced	reduced	poor
23	right	female	22	165	64.9	5	poor	poor	poor
24	left	male	25	164	64.1	6	reduced	reduced	reduced
24	right	male	25	164	64.1	7	poor	poor	poor
25	left	male	21	190	80.5	6	poor	poor	poor
25	right	male	21	190	80.5	5	poor	poor	poor
26	left	female	20	168	63.9	5	good	good	good
26	right	female	20	168	63.9	5	reduced	reduced	reduced
27	left	male	23	175	72.1	1	good	good	good
27	right	male	23	175	72.1	5.9	poor	poor	poor
28	right	male	19	175	107	8	good	good	good
28	left	male	19	175	107	4	good	good	good
29	right	male	20	177	67.9	6	good	good	good
29	left	male	20	177	67.9	6	good	good	good
30	right	male	22	172	83.9	4	good	good	good
30	left	male	22	172	83.9	3	good	good	good
31	right	female	19	154	55.5	4	good	good	good
31	left	female	19	154	55.5	4	good	good	good
32	right	female	21	160	53.6	14	good	good	good
32	left	female	21	160	53.6	4	good	good	good
33	right	female	19	171	58.8	7	good	good	good
33	left	female	19	171	58.8	6	good	good	good
34	right	female	20	162	52.1	12	good	good	good
34	left	female	20	162	52.1	9	good	good	good
35	right	female	20	165	51.7	3	good	good	good
35	left	female	20	165	51.7	3	good	good	good
36	right	male	23	174	73.3	5.2	good	good	good
36	left	male	23	174	73.3	5	good	good	good
37	right	male	24	173	64.5	7	good	good	good
37	left	male	24	173	64.5	6	good	good	good
38	right	female	20	166	62.3	3	good	good	good
38	left	female	20	166	62.3	2	good	good	good
39	right	male	20	186	73.7	1	good	good	good
39	left	male	20	186	73.7	4	good	good	good
40	right	male	19	173	63.2	4	good	good	good
40	left	male	19	173	63.2	6	good	good	good
41	right	male	19	183	81.2	5	good	good	good
41	left	male	19	183	81.2	8	good	good	good
42	right	male	22	195	86.3	2	good	good	good
42	left	male	22	195	86.3	3	good	good	good
43	right	male	22	177	76.9	5	good	good	good
43	left	male	22	177	76.9	7	good	good	good
44	right	male	30	170	66	4	good	good	good
44	left	male	30	170	66	4	good	good	good
45	right	female	20	172	79	5.1	good	good	good
45	left	female	20	172	79	5.3	good	good	good
46	right	female	25	154	53.6	7	good	good	good
46	left	female	25	154	53.6	6	good	good	good
47	right	female	20	152	50.5	8	good	good	good
47	left	female	20	152	50.5	10	good	good	good
48	right	male	23	176	71.4	4	good	good	good
48	left	male	23	176	71.4	2	good	good	good
49	right	female	20	173	61.6	2	good	good	good
49	left	female	20	173	61.6	0	good	good	good
50	right	female	20	164	58.2	7	good	good	good
50	left	female	20	164	58.2	7	good	good	good
51	right	female	20	161	58.2	3	good	good	good
51	left	female	20	161	58.2	6	good	good	good
52	right	male	20	184	68.9	3	good	good	good
52	left	male	20	184	68.9	4	good	good	good
53	right	female	22	177	74.8	5	good	good	good
53	left	female	22	177	74.8	3	good	good	good
54	right	female	21	172	63.4	4	good	good	good
54	left	female	21	172	63.4	6	good	good	good
55	right	female	19	169	52.4	4	good	good	good
55	left	female	19	169	52.4	6	good	good	good
